# Supplementary material
Source: PubMed Central journal article supplement (PMC5654905)
Supplement: JCM.00987-17_zjm999095686s1.pdf [file JCM.00987-17_zjm999095686s1.pdf]

**Supplementary Table S1. EQA test outcomes per sample per laboratory, including scores, method basis and RT-PCR target.**

| sample      | 4                                                  | 5                                                  | 6                                                  | 7                                                   | 8                                                   | 11                                                      | 1                                                         | 2                                          | 3                                      | 9                            | 10                           | 12                          | Score     |           | Method                 | PCR target    |
|-------------|----------------------------------------------------|----------------------------------------------------|----------------------------------------------------|-----------------------------------------------------|-----------------------------------------------------|---------------------------------------------------------|-----------------------------------------------------------|--------------------------------------------|----------------------------------------|------------------------------|------------------------------|-----------------------------|-----------|-----------|------------------------|---------------|
| strain      | Zika virus (Asian lineage)<br>5.54E+6 copies/0.2ml | Zika virus (Asian lineage)<br>3.62E+4 copies/0.2ml | Zika virus (Asian lineage)<br>3.62E+2 copies/0.2ml | Zika virus (African lineage)<br>1.2E+6 copies/0.2ml | Zika virus (African lineage)<br>8.3E+3 copies/0.2ml | Zika virus urine (Asian lineage)<br>2.5E+8 copies/0.2ml | Chikungunya virus (Asian lineage)<br>2.05E+5 copies/0.2ml | Yellow Fever virus<br>8.53E+6 copies/0.2ml | Dengue virus 1<br>5.84E+4 copies/0.2ml | negative control plasma<br>- | negative control plasma<br>- | negative control urine<br>- | ZIKV pos. | ZIKV neg. |                        |               |
| lab/test N° |                                                    |                                                    |                                                    |                                                     |                                                     |                                                         |                                                           |                                            |                                        |                              |                              |                             |           |           |                        |               |
| 1*          | correct                                            | correct                                            | correct                                            | correct                                             | correct                                             | correct                                                 | correct                                                   | correct                                    | correct                                | correct                      | correct                      | correct                     | 12        | 12        | own design             | NS5           |
| 2           | correct                                            | correct                                            | correct                                            | correct                                             | correct                                             | correct                                                 | correct                                                   | correct                                    | correct                                | correct                      | correct                      | correct                     | 12        | 12        | Lanciotti 2008         | E             |
| 3           | correct                                            | correct                                            | correct                                            | correct                                             | correct                                             | correct                                                 | correct                                                   | correct                                    | correct                                | correct                      | correct                      | correct                     | 12        | 12        | Faye 2013              | NS5           |
| 4           | correct                                            | correct                                            | false                                              | correct                                             | correct                                             | correct                                                 | correct                                                   | correct                                    | correct                                | correct                      | correct                      | correct                     | 10        | 12        | Pyke 2014              | NS1           |
| 5           | correct                                            | correct                                            | correct                                            | correct                                             | correct                                             | correct                                                 | correct                                                   | correct                                    | correct                                | correct                      | correct                      | correct                     | 12        | 12        | Lanciotti 2008         | E             |
| 6           | correct                                            | correct                                            | false                                              | correct                                             | false                                               | correct                                                 | correct                                                   | correct                                    | correct                                | correct                      | correct                      | correct                     | 8         | 12        | Altona                 | prM           |
| 7           | correct                                            | correct                                            | correct                                            | correct                                             | correct                                             | correct                                                 | correct                                                   | correct                                    | correct                                | correct                      | correct                      | false                       | 12        | 10        | Altona                 | Unknown       |
| 8           | correct                                            | correct                                            | correct                                            | correct                                             | correct                                             | correct                                                 | correct                                                   | correct                                    | correct                                | correct                      | correct                      | false                       | 12        | 10        | Altona                 | Unknown       |
| 9           | correct                                            | correct                                            | correct                                            | correct                                             | correct                                             | correct                                                 | correct                                                   | correct                                    | correct                                | correct                      | correct                      | correct                     | 12        | 12        | Altona                 | Unknown       |
| 10          | correct                                            | correct                                            | false                                              | correct                                             | correct                                             | correct                                                 | correct                                                   | correct                                    | false                                  | correct                      | correct                      | correct                     | 10        | 10        | Lanciotti 2008         | NS5           |
| 11          | false                                              | false                                              | false                                              | Inconclusive                                        | false                                               | correct                                                 | correct                                                   | correct                                    | correct                                | correct                      | correct                      | correct                     | 3         | 12        | Fast track diagnostics | Unknown       |
| 12          | correct                                            | correct                                            | false                                              | correct                                             | false                                               | correct                                                 | correct                                                   | correct                                    | correct                                | correct                      | correct                      | inconclusive                | 8         | 11        | Genesig                | Unknown       |
| 13          | correct                                            | correct                                            | false                                              | correct                                             | inconclusive                                        | correct                                                 | correct                                                   | correct                                    | correct                                | correct                      | correct                      | correct                     | 9         | 12        | Lanciotti 2008         | Unknown       |
| 14          | correct                                            | correct                                            | false                                              | correct                                             | correct                                             | correct                                                 | correct                                                   | correct                                    | correct                                | correct                      | correct                      | inconclusive                | 10        | 11        | Faye 2013              | NS5           |
| 15          | correct                                            | correct                                            | correct                                            | correct                                             | correct                                             | correct                                                 | correct                                                   | correct                                    | inconclusive                           | correct                      | correct                      | false                       | 12        | 9         | Altona                 | not mentioned |
| 16          | correct                                            | correct                                            | correct                                            | correct                                             | correct                                             | correct                                                 | correct                                                   | correct                                    | correct                                | correct                      | false                        | correct                     | 12        | 10        | own design             | NS3           |
| 17          | correct                                            | correct                                            | false                                              | correct                                             | correct                                             | correct                                                 | correct                                                   | correct                                    | correct                                | correct                      | correct                      | correct                     | 10        | 12        | Lanciotti 2008         | NS1           |
| 18          | correct                                            | correct                                            | correct                                            | correct                                             | correct                                             | correct                                                 | correct                                                   | correct                                    | correct                                | correct                      | correct                      | correct                     | 12        | 12        | Faye 2013              | NS5           |
| 19          | correct                                            | correct                                            | correct                                            | correct                                             | correct                                             | correct                                                 | correct                                                   | correct                                    | correct                                | correct                      | correct                      | false                       | 12        | 10        | Faye 2013              | NS5           |
| 20          | correct                                            | correct                                            | correct                                            | correct                                             | correct                                             | correct                                                 | correct                                                   | correct                                    | correct                                | correct                      | correct                      | correct                     | 12        | 12        | Corman 2016            | E             |
| 21          | correct                                            | correct                                            | false                                              | correct                                             | false                                               | correct                                                 | correct                                                   | correct                                    | correct                                | correct                      | correct                      | correct                     | 8         | 12        | Moureau 2007           | NS5           |

| sample      | 4                          | 5                          | 6                          | 7                            | 8                            | 11                               | 1                                 | 2                    | 3                    | 9                       | 10                      | 12                     | Score     |           | Method                 | PCR target    |
|-------------|----------------------------|----------------------------|----------------------------|------------------------------|------------------------------|----------------------------------|-----------------------------------|----------------------|----------------------|-------------------------|-------------------------|------------------------|-----------|-----------|------------------------|---------------|
| strain      | Zika virus (Asian lineage) | Zika virus (Asian lineage) | Zika virus (Asian lineage) | Zika virus (African lineage) | Zika virus (African lineage) | Zika virus urine (Asian lineage) | Chikungunya virus (Asian lineage) | Yellow Fever virus   | Dengue virus 1       | negative control plasma | negative control plasma | negative control urine | ZIKV pos. | ZIKV neg. |                        |               |
| lab/test N° | 5.54E+6 copies/0.2ml       | 3.62E+4 copies/0.2ml       | 3.62E+2 copies/0.2ml       | 1.2E+6 copies/0.2ml          | 8.3E+3 copies/0.2ml          | 2.5E+8 copies/0.2ml              | 2.05E+5 copies/0.2ml              | 8.53E+6 copies/0.2ml | 5.84E+4 copies/0.2ml | -                       | -                       | -                      |           |           |                        |               |
| 22          | correct                    | correct                    | inconclusive               | correct                      | correct                      | correct                          | correct                           | correct              | correct              | correct                 | correct                 | correct                | 11        | 12        | Lanciotti 2008         | E             |
| 23          | correct                    | false                      | false                      | correct                      | false                        | correct                          | correct                           | correct              | correct              | correct                 | correct                 | not done               | 6         | 10/10     | Faye 2013              | NS5           |
| 24A         | correct                    | inconclusive               | false                      | correct                      | inconclusive                 | correct                          | correct                           | correct              | correct              | correct                 | correct                 | correct                | 8         | 12        | Lanciotti 2008         | NS5           |
| 24B         | correct                    | false                      | false                      | correct                      | false                        | correct                          | correct                           | correct              | correct              | correct                 | correct                 | correct                | 6         | 12        | Liferiver              | Unknown       |
| 25A         | false                      | false                      | false                      | false                        | false                        | correct                          | correct                           | correct              | correct              | correct                 | correct                 | correct                | 2         | 12        | Tappe 2014             | NS3           |
| 25B         | correct                    | false                      | false                      | correct                      | false                        | correct                          | correct                           | correct              | correct              | correct                 | correct                 | correct                | 6         | 12        | Altona                 | Unknown       |
| 26A         | correct                    | false                      | false                      | false                        | false                        | correct                          | correct                           | correct              | correct              | correct                 | correct                 | correct                | 4         | 12        | Liferiver              | Unknown       |
| 26B         | correct                    | false                      | false                      | correct                      | false                        | correct                          | correct                           | correct              | correct              | correct                 | correct                 | correct                | 6         | 12        | Trioplex               | E             |
| 27A         | correct                    | correct                    | correct                    | correct                      | correct                      | correct                          | inconclusive                      | correct              | correct              | correct                 | correct                 | correct                | 12        | 11        | own design             | E             |
| 27B         | correct                    | correct                    | correct                    | correct                      | correct                      | correct                          | correct                           | correct              | correct              | correct                 | correct                 | correct                | 12        | 12        | own design             | NS3           |
| 28A         | correct                    | correct                    | false                      | correct                      | correct                      | correct                          | correct                           | correct              | correct              | correct                 | correct                 | correct                | 10        | 12        | own design             | 3'UTR         |
| 28B         | correct                    | correct                    | correct                    | correct                      | correct                      | correct                          | correct                           | correct              | correct              | correct                 | correct                 | correct                | 12        | 12        | Faye 2013              | NS5           |
| 29A         | correct                    | correct                    | correct                    | correct                      | false                        | correct                          | correct                           | correct              | correct              | correct                 | correct                 | correct                | 10        | 12        | Lanciotti 2008         | E             |
| 29B         | correct                    | correct                    | correct                    | correct                      | false                        | correct                          | correct                           | correct              | correct              | correct                 | correct                 | correct                | 10        | 12        | Altona                 | Unknown       |
| 30A         | correct                    | correct                    | false                      | correct                      | false                        | correct                          | correct                           | correct              | correct              | correct                 | correct                 | correct                | 8         | 12        | Faye 2013              | NS5           |
| 30B         | correct                    | correct                    | correct                    | correct                      | correct                      | correct                          | correct                           | correct              | false                | correct                 | correct                 | correct                | 12        | 10        | Lanciotti 2008         | E             |
| 31A         | correct                    | correct                    | false                      | correct                      | correct                      | correct                          | correct                           | correct              | correct              | correct                 | correct                 | correct                | 10        | 12        | Lanciotti 2008         | not mentioned |
| 31B         | correct                    | correct                    | false                      | correct                      | correct                      | correct                          | correct                           | correct              | correct              | correct                 | correct                 | correct                | 10        | 12        | Trioplex               | not mentioned |
| 32A         | correct                    | correct                    | correct                    | correct                      | correct                      | correct                          | correct                           | correct              | correct              | correct                 | correct                 | correct                | 12        | 12        | Altona                 | Unknown       |
| 32B         | correct                    | correct                    | correct                    | correct                      | false                        | correct                          | correct                           | correct              | correct              | correct                 | correct                 | correct                | 10        | 12        | own design             | NS2B          |
| 33A         | correct                    | correct                    | correct                    | correct                      | correct                      | correct                          | correct                           | correct              | correct              | correct                 | correct                 | correct                | 12        | 12        | own design             | NS3           |
| 33B         | correct                    | correct                    | correct                    | correct                      | correct                      | correct                          | correct                           | correct              | correct              | correct                 | correct                 | correct                | 12        | 12        | Altona                 | Unknown       |
| 34A         | correct                    | correct                    | correct                    | correct                      | correct                      | correct                          | correct                           | correct              | correct              | correct                 | correct                 | false                  | 12        | 10        | Lanciotti 2008         | E             |
| 34B         | correct                    | correct                    | false                      | correct                      | correct                      | correct                          | correct                           | correct              | correct              | correct                 | correct                 | false                  | 10        | 10        | Sacace Biotechnologies | Unknown       |

| sample      | 4                                                  | 5                                                  | 6                                                  | 7                                                 | 8                                                   | 11                                                      | 1                                                           | 2                                          | 3                                      | 9                            | 10                           | 12                          | Score     |           | Method             | PCR target    |
|-------------|----------------------------------------------------|----------------------------------------------------|----------------------------------------------------|---------------------------------------------------|-----------------------------------------------------|---------------------------------------------------------|-------------------------------------------------------------|--------------------------------------------|----------------------------------------|------------------------------|------------------------------|-----------------------------|-----------|-----------|--------------------|---------------|
| strain      | Zika virus (Asian lineage)<br>5.54E+6 copies/0.2ml | Zika virus (Asian lineage)<br>3.62E+4 copies/0.2ml | Zika virus (Asian lineage)<br>3.62E+2 copies/0.2ml | Zika virus (Asian lineage)<br>1.2E+6 copies/0.2ml | Zika virus (African lineage)<br>8.3E+3 copies/0.2ml | Zika virus urine (Asian lineage)<br>2.5E+8 copies/0.2ml | Chikungunya a virus (Asian lineage)<br>2.05E+5 copies/0.2ml | Yellow Fever virus<br>8.53E+6 copies/0.2ml | Dengue virus 1<br>5.84E+4 copies/0.2ml | negative control plasma<br>- | negative control plasma<br>- | negative control urine<br>- | ZIKV pos. | ZIKV neg. |                    |               |
| lab/test N° |                                                    |                                                    |                                                    |                                                   |                                                     |                                                         |                                                             |                                            |                                        |                              |                              |                             |           |           |                    |               |
| 35A         | correct                                            | false                                              | false                                              | correct                                           | false                                               | correct                                                 | correct                                                     | correct                                    | correct                                | correct                      | correct                      | correct                     | 6         | 12        | Faye 2013          | NS5           |
| 35B         | correct                                            | false                                              | false                                              | correct                                           | false                                               | correct                                                 | correct                                                     | correct                                    | correct                                | correct                      | correct                      | correct                     | 6         | 12        | Altona             | Unknown       |
| 36A         | correct                                            | correct                                            | false                                              | correct                                           | false                                               | correct                                                 | correct                                                     | correct                                    | correct                                | correct                      | correct                      | correct                     | 8         | 12        | Lanciotti 2008     | NS5           |
| 36B         | correct                                            | correct                                            | false                                              | correct                                           | correct                                             | correct                                                 | correct                                                     | correct                                    | false                                  | correct                      | correct                      | correct                     | 10        | 10        | Trioplex           | Unknown       |
| 37A         | correct                                            | false                                              | correct                                            | inconclusive                                      | correct                                             | correct                                                 | correct                                                     | inconclusive                               | correct                                | correct                      | correct                      | correct                     | 9         | 11        | Altona             | not mentioned |
| 37B         | correct                                            | false                                              | correct                                            | false                                             | correct                                             | correct                                                 | correct                                                     | correct                                    | correct                                | correct                      | correct                      | correct                     | 8         | 12        | Balm 2012          | not mentioned |
| 38A         | correct                                            | correct                                            | false                                              | correct                                           | correct                                             | correct                                                 | correct                                                     | correct                                    | correct                                | correct                      | correct                      | correct                     | 10        | 12        | Corman 2016        | E             |
| 38B         | correct                                            | correct                                            | correct                                            | correct                                           | correct                                             | correct                                                 | correct                                                     | correct                                    | correct                                | correct                      | correct                      | correct                     | 12        | 12        | Corman 2016        | NS1           |
| 38C         | correct                                            | correct                                            | correct                                            | correct                                           | correct                                             | correct                                                 | correct                                                     | correct                                    | correct                                | correct                      | correct                      | correct                     | 12        | 12        | Altona             | Unknown       |
| 39A         | correct                                            | correct                                            | correct                                            | correct                                           | correct                                             | correct                                                 | correct                                                     | correct                                    | correct                                | correct                      | correct                      | correct                     | 12        | 12        | Lanciotti 2008     | E             |
| 39B         | correct                                            | correct                                            | correct                                            | correct                                           | correct                                             | correct                                                 | correct                                                     | correct                                    | correct                                | correct                      | correct                      | correct                     | 12        | 12        | Roche              | NS2A          |
| 39C         | correct                                            | correct                                            | false                                              | correct                                           | correct                                             | correct                                                 | correct                                                     | correct                                    | correct                                | correct                      | correct                      | correct                     | 10        | 12        | Scaramozzi no 2001 | NS5           |
| 40A         | correct                                            | correct                                            | correct                                            | correct                                           | correct                                             | correct                                                 | correct                                                     | correct                                    | correct                                | correct                      | correct                      | correct                     | 12        | 12        | Altona             | Unknown       |
| 40B         | correct                                            | correct                                            | correct                                            | correct                                           | correct                                             | correct                                                 | correct                                                     | correct                                    | correct                                | correct                      | correct                      | correct                     | 12        | 12        | Faye 2013          | NS5           |
| 40C         | correct                                            | correct                                            | false                                              | correct                                           | correct                                             | correct                                                 | correct                                                     | correct                                    | correct                                | correct                      | correct                      | correct                     | 10        | 12        | own design         | NS5           |
| 41A         | correct                                            | false                                              | false                                              | correct                                           | false                                               | correct                                                 | correct                                                     | correct                                    | correct                                | correct                      | correct                      | correct                     | 6         | 12        | Faye 2008          | E             |
| 41B         | correct                                            | false                                              | false                                              | correct                                           | false                                               | correct                                                 | correct                                                     | correct                                    | correct                                | correct                      | correct                      | correct                     | 6         | 12        | Faye 2013          | NS5           |
| 41C         | correct                                            | correct                                            | false                                              | correct                                           | correct                                             | correct                                                 | correct                                                     | correct                                    | false                                  | correct                      | correct                      | correct                     | 10        | 10        | Trioplex           | Unknown       |
| 42A         | correct                                            | false                                              | false                                              | correct                                           | false                                               | correct                                                 | correct                                                     | correct                                    | correct                                | correct                      | correct                      | correct                     | 6         | 12        | Faye 2013          | NS5           |
| 42B         | correct                                            | correct                                            | false                                              | correct                                           | false                                               | correct                                                 | correct                                                     | correct                                    | correct                                | correct                      | correct                      | correct                     | 8         | 12        | own design         | Unknown       |
| 42C         | correct                                            | correct                                            | correct                                            | correct                                           | false                                               | correct                                                 | correct                                                     | correct                                    | correct                                | false                        | correct                      | correct                     | 10        | 10        | own design         | 3'UTR         |
| 42D         | correct                                            | correct                                            | correct                                            | correct                                           | false                                               | correct                                                 | correct                                                     | correct                                    | correct                                | correct                      | false                        | correct                     | 10        | 10        | own design         | NS1           |
| 43A         | correct                                            | false                                              | false                                              | correct                                           | false                                               | correct                                                 | correct                                                     | correct                                    | correct                                | correct                      | correct                      | correct                     | 6         | 12        | Faye 2013          | NS5           |
| 43B         | correct                                            | correct                                            | correct                                            | correct                                           | correct                                             | correct                                                 | correct                                                     | correct                                    | correct                                | correct                      | correct                      | correct                     | 12        | 12        | Corman 2016        | NS1           |

| sample      | 4                                                  | 5                                                  | 6                                                  | 7                                                 | 8                                                   | 11                                                      | 1                                                         | 2                                          | 3                                      | 9                            | 10                           | 12                          | Score     |           | Method             | PCR target |
|-------------|----------------------------------------------------|----------------------------------------------------|----------------------------------------------------|---------------------------------------------------|-----------------------------------------------------|---------------------------------------------------------|-----------------------------------------------------------|--------------------------------------------|----------------------------------------|------------------------------|------------------------------|-----------------------------|-----------|-----------|--------------------|------------|
| strain      | Zika virus (Asian lineage)<br>5.54E+6 copies/0.2ml | Zika virus (Asian lineage)<br>3.62E+4 copies/0.2ml | Zika virus (Asian lineage)<br>3.62E+2 copies/0.2ml | Zika virus (Asian lineage)<br>1.2E+6 copies/0.2ml | Zika virus (African lineage)<br>8.3E+3 copies/0.2ml | Zika virus urine (Asian lineage)<br>2.5E+8 copies/0.2ml | Chikungunya virus (Asian lineage)<br>2.05E+5 copies/0.2ml | Yellow Fever virus<br>8.53E+6 copies/0.2ml | Dengue virus 1<br>5.84E+4 copies/0.2ml | negative control plasma<br>- | negative control plasma<br>- | negative control urine<br>- | ZIKV pos. | ZIKV neg. |                    |            |
| lab/test N° |                                                    |                                                    |                                                    |                                                   |                                                     |                                                         |                                                           |                                            |                                        |                              |                              |                             |           |           |                    |            |
| 43C         | correct                                            | correct                                            | correct                                            | correct                                           | correct                                             | correct                                                 | correct                                                   | correct                                    | correct                                | correct                      | correct                      | correct                     | 12        | 12        | Corman 2016        | E          |
| 43D         | correct                                            | correct                                            | correct                                            | correct                                           | correct                                             | correct                                                 | correct                                                   | correct                                    | correct                                | correct                      | correct                      | correct                     | 12        | 12        | Roche              | NS1        |
| 44A         | correct                                            | correct                                            | false                                              | correct                                           | correct                                             | correct                                                 | correct                                                   | correct                                    | correct                                | correct                      | correct                      | correct                     | 10        | 12        | own design         | NS5        |
| 44B         | correct                                            | correct                                            | false                                              | correct                                           | false                                               | correct                                                 | correct                                                   | correct                                    | correct                                | correct                      | correct                      | correct                     | 8         | 12        | Lanciotti 2008     | E          |
| 44C         | correct                                            | false                                              | false                                              | correct                                           | correct                                             | correct                                                 | correct                                                   | correct                                    | correct                                | correct                      | correct                      | correct                     | 8         | 12        | Patel 2013         | NS5        |
| 44D         | correct                                            | false                                              | false                                              | correct                                           | correct                                             | correct                                                 | correct                                                   | correct                                    | correct                                | correct                      | correct                      | correct                     | 8         | 12        | Scaramozzi no 2001 | NS5        |
| 45          | correct                                            | correct                                            | correct                                            | correct                                           | correct                                             | correct                                                 | correct                                                   | correct                                    | correct                                | correct                      | correct                      | correct                     | 12        | 12        | Altona             | Unknown    |
| 46          | correct                                            | correct                                            | correct                                            | correct                                           | correct                                             | correct                                                 | correct                                                   | correct                                    | correct                                | correct                      | correct                      | false                       | 12        | 10        | Lanciotti 2008     | Unknown    |
| 47          | correct                                            | correct                                            | correct                                            | correct                                           | correct                                             | correct                                                 | correct                                                   | correct                                    | correct                                | correct                      | correct                      | correct                     | 12        | 12        | Altona             | Unknown    |
| 48A         | correct                                            | correct                                            | correct                                            | correct                                           | false                                               | correct                                                 | correct                                                   | correct                                    | correct                                | correct                      | correct                      | correct                     | 10        | 12        | Lanciotti 2008     | E          |
| 48B         | correct                                            | correct                                            | correct                                            | correct                                           | correct                                             | correct                                                 | correct                                                   | correct                                    | correct                                | correct                      | correct                      | correct                     | 12        | 12        | Clonit             | NS5        |
| 48C         | correct                                            | correct                                            | false                                              | correct                                           | false                                               | correct                                                 | correct                                                   | correct                                    | correct                                | correct                      | correct                      | correct                     | 8         | 12        | Scaramozzi no 2001 | NS5        |
| 49A         | correct                                            | correct                                            | correct                                            | correct                                           | correct                                             | correct                                                 | correct                                                   | correct                                    | correct                                | correct                      | correct                      | correct                     | 12        | 12        | Lanciotti 2008     | E          |
| 49B         | correct                                            | correct                                            | correct                                            | correct                                           | correct                                             | correct                                                 | correct                                                   | correct                                    | correct                                | correct                      | correct                      | correct                     | 12        | 12        | Corman 2016        | NS1        |
| 49C         | correct                                            | correct                                            | correct                                            | correct                                           | correct                                             | correct                                                 | correct                                                   | correct                                    | correct                                | correct                      | correct                      | correct                     | 12        | 12        | Altona             | Unknown    |
| 50          | correct                                            | correct                                            | correct                                            | correct                                           | correct                                             | correct                                                 | correct                                                   | correct                                    | correct                                | correct                      | correct                      | correct                     | 12        | 12        | Faye 2013          | NS5        |
| Total       | 97.6% correct                                      | 78.8% correct                                      | 52.9% correct                                      | 94.1% correct                                     | 65.9% correct                                       | 100% correct                                            | 98.8% correct                                             | 98.8% correct                              | 94.1% correct                          | 98.8% correct                | 97.6% correct                | 89.3% correct (n=84)        |           |           |                    |            |

\* Each laboratory was linked to an unique number to ensure anonymity in result evaluation. If a laboratory assessed more than one diagnostic test, letters (a, b, c, d) were used to code the different tests.
