# Supplementary material
Source: PubMed Central journal article supplement (PMC5654905)
Supplement: JCM.00987-17_zjm999095686s2.pdf [file JCM.00987-17_zjm999095686s2.pdf]

1 **Supplementary Table S2.** Analytical sensitivity and specificity of different extraction  
 2 methods combined with specific molecular detection methods.

|                              |                                  | MagNA Pure Roche                 | NucliSENS EasyMAG bioMerieux | QIAamp Viral RNA Mini Kit Qiagen | Qia-symphony Qiagen | EZ1 Virus Mini Kit Qiagen | Manual extraction - | NucleoSpin RNA Virus Macherey-Nagel | RTP Pathogen kit Stratec | iPrep PureLink Virus Kit Thermo Fisher Scientific | magLEAD 6gC kit magDEA Dx SV PSS | MinElute Virus Spin Mini Kit Qiagen |  |
|------------------------------|----------------------------------|----------------------------------|------------------------------|----------------------------------|---------------------|---------------------------|---------------------|-------------------------------------|--------------------------|---------------------------------------------------|----------------------------------|-------------------------------------|--|
| Sensitivity*                 | Altona Balm 2012                 | 100 (2)                          | 58 (2)                       | 92 (3)                           | 100 (1)             |                           |                     |                                     |                          |                                                   |                                  |                                     |  |
|                              | Clonit Corman 2016               | 94 (3)                           |                              | 100 (1)                          |                     | 100 (2)                   |                     |                                     |                          |                                                   |                                  |                                     |  |
|                              | Fast track diagnostics Faye 2008 |                                  |                              |                                  |                     |                           |                     |                                     |                          |                                                   |                                  |                                     |  |
|                              | Faye 2013                        | 89 (3)                           | 50 (2)                       | 88 (4)                           |                     | 50 (1)                    |                     |                                     |                          |                                                   |                                  |                                     |  |
|                              | Genesig Lanciotti 2008           | 100 (3)                          | 100 (1)                      | 83 (5)                           | 83 (1)              |                           | 83 (1)              | 100 (1)                             | 67 (1)                   |                                                   |                                  |                                     |  |
|                              | Liferiver Moureau 2007           |                                  |                              | 67 (1)                           |                     |                           |                     |                                     |                          |                                                   |                                  |                                     |  |
|                              | own design Patel 2013            | 83 (1)                           |                              | 79 (4)                           |                     | 100 (1)                   |                     |                                     |                          | 100 (1)                                           | 100 (2)                          |                                     |  |
|                              | Pyke 2014                        |                                  |                              | 67 (1)                           |                     |                           | 83 (1)              |                                     |                          |                                                   |                                  |                                     |  |
|                              | Roche Sacace Biotechnologies     |                                  |                              |                                  |                     |                           |                     |                                     |                          |                                                   |                                  |                                     |  |
|                              | Scaramozzino 2001                | 83 (1)                           |                              | 67 (1)                           | 67 (1)              |                           |                     |                                     |                          |                                                   |                                  |                                     |  |
|                              | Tappe 2014                       |                                  |                              |                                  |                     |                           |                     |                                     |                          |                                                   |                                  |                                     |  |
|                              | US CDC-Trioplex                  |                                  |                              | 83 (1)                           |                     |                           |                     |                                     | 83 (1)                   |                                                   |                                  | 50 (1)                              |  |
|                              | Specificity*                     | Altona Balm 2012                 | 83 (2)                       | 100 (2)                          | 97 (3)              | 100 (1)                   |                     |                                     |                          |                                                   |                                  |                                     |  |
|                              |                                  | Clonit Corman 2016               | 100 (3)                      |                                  | 100 (1)             |                           | 100 (2)             |                                     |                          |                                                   |                                  |                                     |  |
|                              |                                  | Fast track diagnostics Faye 2008 |                              |                                  |                     |                           |                     |                                     |                          |                                                   |                                  |                                     |  |
|                              |                                  | Faye 2013                        | 100 (3)                      | 100 (2)                          | 96 (4)              |                           | 100 (1)             |                                     |                          |                                                   |                                  |                                     |  |
| Genesig Lanciotti 2008       |                                  | 94 (3)                           | 100 (1)                      | 97 (5)                           | 100 (1)             |                           | 83 (1)              | 100 (1)                             | 100 (1)                  |                                                   |                                  |                                     |  |
| Liferiver Moureau 2007       |                                  |                                  |                              | 100 (1)                          |                     |                           |                     |                                     |                          |                                                   |                                  |                                     |  |
| own design Patel 2013        |                                  | 100 (1)                          |                              | 92 (4)                           |                     | 100 (1)                   |                     |                                     | 83 (1)                   | 96 (2)                                            |                                  |                                     |  |
| Pyke 2014                    |                                  |                                  |                              | 100 (1)                          |                     |                           |                     |                                     |                          |                                                   |                                  |                                     |  |
| Roche Sacace Biotechnologies |                                  |                                  |                              |                                  |                     |                           |                     |                                     |                          |                                                   |                                  |                                     |  |
| Scaramozzino 2001            |                                  | 100 (1)                          |                              | 100 (1)                          | 100 (1)             |                           |                     |                                     |                          |                                                   |                                  |                                     |  |
| Tappe 2014                   |                                  |                                  |                              |                                  |                     |                           |                     |                                     |                          |                                                   |                                  |                                     |  |
| US CDC-Trioplex              |                                  |                                  |                              | 100 (1)                          |                     |                           |                     |                                     | 83 (1)                   |                                                   |                                  | 100 (1)                             |  |

3  
 4 The colour range indicates the percentages of sensitivity and specificity, with white being 100% and dark  
 5 red 0%. Total number of submissions per test-method combination is given in parenthesis (n) to provide  
 6 context for interpretation. For 30 tests the extraction method was not indicated with result submission. Of

- 7 note, information to distinguish MPLC and MP96 extraction systems when analysing MagNA Pure
- 8 extraction method was not provided.
